# Supplementary material for: Homocysteinethiolactone and Paraoxonase: Novel markers of diabetic retinopathy
Source: PubMed Central journal article supplement — Diabetes Care. 2010 Jun 14;33(9):2031–7. doi: 10.2337/dc10-0132 (PMC2928358; doi:10.2337/dc10-0132), 2010-06-14
Supplement: supp_dc10-0132v100132_DC100132onlineappendix.pdf [file supp_dc10-0132v100132_DC100132onlineappendix.pdf]

**ONLINE APPENDIX**

**TABLE I: Clinical data of Patients with Macular Hole**

| <b>Age/<br/>Sex</b> | <b>Past<br/>history</b>         | <b>Treatment<br/>for Systemic<br/>Disorder</b> | <b>Other<br/>Ocular<br/>Dis-<br/>order</b> | <b>Duration<br/>of Vision<br/>Loss</b> | <b>Eye<br/>Affected</b> | <b>Macular Hole<br/>Grade</b>  | <b>Treatment</b> | <b>Baseline<br/>Investigations</b> |
|---------------------|---------------------------------|------------------------------------------------|--------------------------------------------|----------------------------------------|-------------------------|--------------------------------|------------------|------------------------------------|
| 61/F                | G <sub>6</sub> PD<br>Deficiency | T. Olvo<br>T.Nayapred<br>T. Oplex              | NIL                                        | 1 Month                                | OD                      | FTMH                           | NIL              | RBS- 103<br>BU- 32<br>SCR- 1.07    |
| 55/M                | NIL                             | NIL                                            | NIL                                        | 2 Years                                | OD                      | FTMH                           | NIL              | RBS- 133                           |
| 31/M                | HT                              | NIL                                            | NIL                                        | 3 Months                               | OD                      | FTMH                           | NIL              | RBS- 100                           |
| 54/F                | Raised BS<br>levels             | T. Glyciphage<br>500mg<br>T. Losar 50          | NIL                                        | 6 months                               | OU                      | FTMH                           | NIL              | RBS- 233                           |
| 63/M                | NIL                             | NIL                                            | NIL                                        | 6 months                               | OS                      | FTMH                           | NIL              | RBS- 115<br>BU- 15<br>SCR- 0.9     |
| 65/F                | Trigemina<br>l neuralgia        | T. tegretal CR<br>T. Baclofen                  | NIL                                        | 4 months                               | OS                      | FTMH                           | NIL              | RBS- 138<br>BU- 23<br>SCR- 0.8     |
| 67/M                |                                 |                                                |                                            | 1 month                                | OD                      |                                |                  |                                    |
| 57/M                | NIL                             | NIL                                            | Nil                                        | 2 years                                | OU                      | OD= FTMH<br>OS= Lamellar<br>MH | NIL              | RBS 108                            |

FTMH, full thickness macular hole; PVD, posterior vitreous detachment; CNVM, choroidal neovascular membrane; ERM, epiretinal membrane; RBS, random blood sugar; SCR, serum creatinine; BU, blood urea.

**TABLE II: Clinical Data of patients with PDR**

| Age/<br>Sex | Past<br>Treat-<br>ment<br>History | Duration<br>of<br>Diabetes<br>(yrs) | Type | DR<br>Quadra<br>nt | Vit<br>Haem | Retinal<br>Detach-<br>ment | Other<br>features         | Eye<br>Operated | Treatment                                                          | Baseline<br>Investigat<br>ions   | Associated<br>Disorder                           |
|-------------|-----------------------------------|-------------------------------------|------|--------------------|-------------|----------------------------|---------------------------|-----------------|--------------------------------------------------------------------|----------------------------------|--------------------------------------------------|
| 43/<br>F    | None                              | 16                                  | 1    | 4                  | +           | TRD                        | OU=FVP                    | OU              | T losar,<br>T Femolid,                                             | RBS-322,<br>BU-22,<br>SCR-0.8    | Hypercholeste<br>rolemia                         |
| 61/<br>F    | None                              | 29                                  | 1    | 4                  | -           | CRD                        | OD= 360°<br>NVI<br>FVP    | OD              | T Atenolol,<br>T Glyco phage,<br>T Lipitor,<br>T Pioglitozone      | RBS 300,<br>BU-69,<br>SCR-2.5    | HT,<br>Hypercholeste<br>rolemia, CKD<br>Stage IV |
| 54/<br>M    | Laser,<br>Anti<br>VEGF            | 3                                   | 1    | 4                  | +           | None                       | OU=PVD                    | OU              | T Glumet,                                                          | RBS-251,<br>SCr -1.5<br>BU-39    | HT                                               |
| 52/<br>M    | Laser                             | 26                                  | 1    | 4                  | +           | TRD+<br>VMT                | OS= 360°<br>NVI<br>OD=ERM | OS              | T Glucoret<br>Forte,<br>Acarbose                                   | RBS-287,<br>BU-18 ,S<br>SCR-1.00 | None                                             |
| 47/<br>M    | None                              | 15                                  | 1    | 4                  | OD<br>=+    | TRD                        | OD=FVP                    | OU              | T Glycidem, T<br>Isinexex,<br>T Ethanbutol                         | RBS-251,<br>SCR-1.1.<br>BU 26    | HT, DN                                           |
| 53/<br>M    | Laser                             | 20                                  | 1    | 4                  | OS<br>=+    | OS=TRD                     | OU=<br>NVE,NV<br>D, FVP   | OU              | T Nalop, T<br>Atorva,<br>T Glycalazide, T<br>Metformin<br>T Asprin | RBS-241.<br>BU 35,<br>SCR-1.1    | Hypercholeste<br>rolemia                         |
| 46/<br>F    | Laser                             | 20                                  | 1    | 4                  | OD<br>=+    | CRD                        | OS=FVP                    | OD              | T Reclide,<br>T Aztor 10mg.                                        | RBS-231,<br>BU -23,              | None                                             |

|          |                        |             |   |   |          |          |                            |    |                                                                                       |                                            |                                |
|----------|------------------------|-------------|---|---|----------|----------|----------------------------|----|---------------------------------------------------------------------------------------|--------------------------------------------|--------------------------------|
|          |                        |             |   |   |          |          |                            |    | T Losor H,<br>T Trioptal                                                              | SCR-0.9                                    |                                |
| 68/<br>M | Laser,<br>AntiVE<br>GF | 6<br>months | 1 | 4 | +        | OD=CRD   | OS=FVP                     | OD | T Gemet,<br>T Metpure XI,<br>T Atorva. T<br>Olmesar H                                 | RBS-159.<br>BU-38,<br>SCR- 1.1             | HT                             |
| 49/<br>M | Laser                  | 12          | 1 | 4 | OD<br>=+ | OS=TRD   | OU+FVP<br>OD=NVE           | OS | T Eslo 5, T<br>Glimi H2 T<br>lipicure                                                 | RBS-231,<br>BU-33.<br>SCR-1                | HT, DN                         |
| 54/<br>M | None                   | 20          | 2 | 4 | OS<br>=+ | OS=TRD   | OD=FVP,<br>NVE             | OU | TGlyclazide,<br>Bisoprolol, T<br>Orlibose, T Mini<br>Press, T Telvas.<br>T Amlodipine | RBS 152.<br>BU 39,<br>SCR-1.4              | None                           |
| 54/<br>F | Laser                  | 10          | 2 | 4 | +        | OS= TRD  | OD=NVD<br>OU= FVP          | OU | Inj Mixtard 12-<br>0-12,<br>T Atorva, T<br>Rapace,<br>T Glynace MF.<br>T.Stamlo beta  | RBS 287,<br>FBS-210,<br>BU-40,<br>SCR- 1.2 | HTN, DN,<br>HYPOTHYR<br>OIDISM |
| 48/<br>F | None                   | 10          | 2 | 4 | +        | None     | OS = FVP                   | OU | T Atocar,<br>T Pyoglit,<br>T Dyotor, T<br>Glynipide<br>T Amtas                        | BU-51,<br>Scr-1.5.<br>RBS-160              | CRF<br>cardiomyopat<br>hy      |
| 53/<br>M | Laser                  | 24          | 2 | 4 | +        | OS = TRD | OS =FVP,<br>TRD<br>OD=CSME | OU | T Glucored, T<br>Envas,                                                               | RBS-337,<br>BU-31,<br>SCR-1.1              | None                           |

HT, Hypertension; CKD, chronic kidney disease; CRF, chronic renal failure; VEGF: vascular endothelial growth factor; CSME, clinically significant macular edema; TRD, tractional retinal detachment; CRD, combined retinal detachment; NVE, neovascularisation elsewhere; NVI, neovascularization iris; NVD, neovascularization disc; FVP, fibrovascular proliferation; DR, diabetic retinopathy; DN, diabetic nephropathy; VMT, vitreomacular traction; RBS, random blood sugar; SCR, serum creatinine; BU, blood urea.
